# Supplementary material for: Transient Replication in Specialized Cells Favors Transfer of an Integrative and Conjugative Element
Source: PubMed Central journal article supplement (PMC6561031; doi:10.1128/mbio.01133-19), 2019-06-11
Supplement: mBio.01133-19-sf002.pdf [file mBio.01133-19-sf002.pdf]

### Non-tc cells

### tc cells

percentage

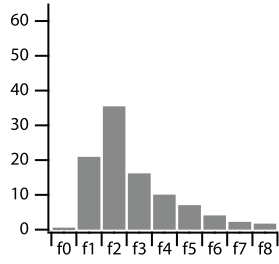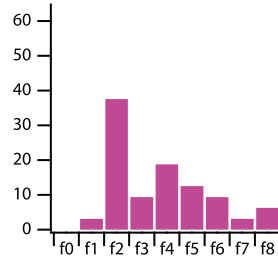

score = 1  
intensity = 1

percentage

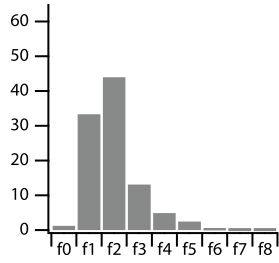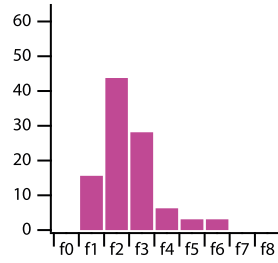

score = 2  
intensity = 2

percentage

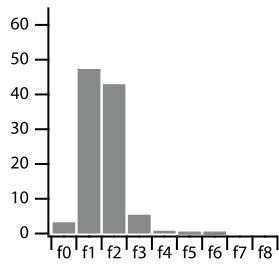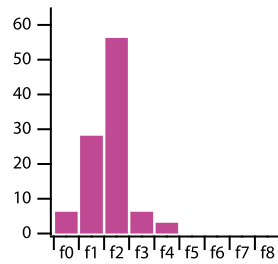

score = 3  
intensity = 3

percentage

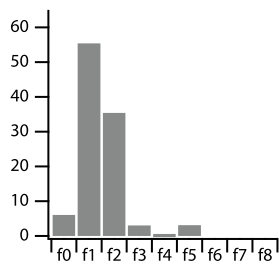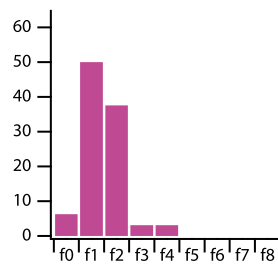

score = 4  
intensity = 4

percentage

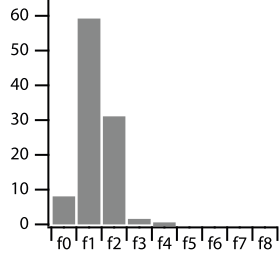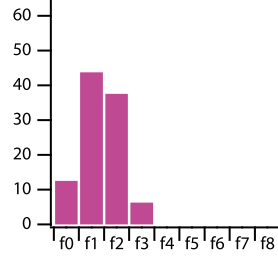

score = 5  
intensity = 5

percentage

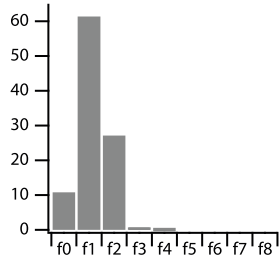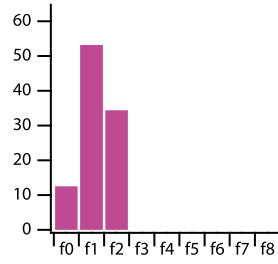

score = 6  
intensity = 6

percentage

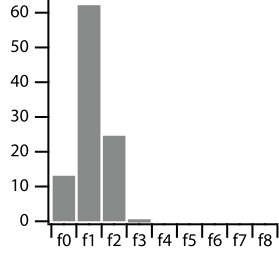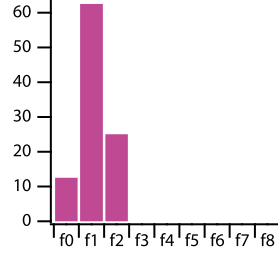

score = 7  
intensity = 7

foci 0-8

foci 0-8

**Supplementary Figure S2** | Effect of score and intensity thresholding on foci distributions in *P. putida* UWC1-*clc5*,  $\Delta$ *mfsR*,  $\Delta$ *attL*, *lacO*<sub>ARRAY</sub>, *Tn7 araC;lacI-cfp*, *Tn5 P<sub>inR</sub>-echerry* (strain 5357). Since this strain lacks the ICE attachment sites, it cannot excise, which was verified by PCR (Delavat, 2016). The lowest threshold setting with minimal foci appearance >2 (score=6 and intensity = 6) was thus used for the experiments

Delavat, F., Mitri, S., Pelet, S. & van der Meer, J. R. Highly variable individual donor cell fates characterize robust horizontal gene transfer of an integrative and conjugative element. *Proc Natl Acad Sci U S A* 113, E3375-3383 (2016).
