# Supplementary material for: Transient Replication in Specialized Cells Favors Transfer of an Integrative and Conjugative Element
Source: PubMed Central journal article supplement (PMC6561031; doi:10.1128/mbio.01133-19), 2019-06-11
Supplement: mBio.01133-19-sf004.pdf [file mBio.01133-19-sf004.pdf]

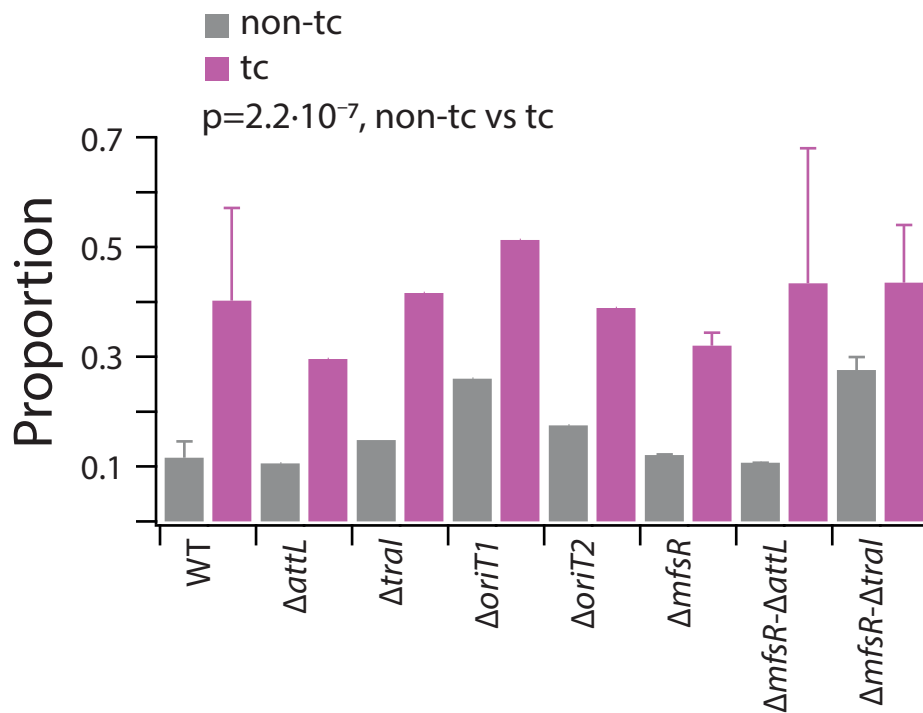

#### Supplementary Figure S4 |

Proportions of cells without any detectable foci in non-tc and tc cells of *P. putida* ICE $clc-lacO_{ARRAY}$ ; *araC, lacI-cfp*;  $P_{inR}$ -*echerry* with mutations in critical ICE excision or replication functions.

Error bars indicate calculated standard deviations from the mean of biological replicates. P-value of testing the proportions between non-tc and tc cells across all strains (single-sided t-test, hypothesis that tc cells have higher proportions of cells with any detected foci).
