# Supplementary material for: Transient Replication in Specialized Cells Favors Transfer of an Integrative and Conjugative Element
Source: PubMed Central journal article supplement (PMC6561031; doi:10.1128/mbio.01133-19), 2019-06-11
Supplement: mBio.01133-19-sf005.pdf [file mBio.01133-19-sf005.pdf]

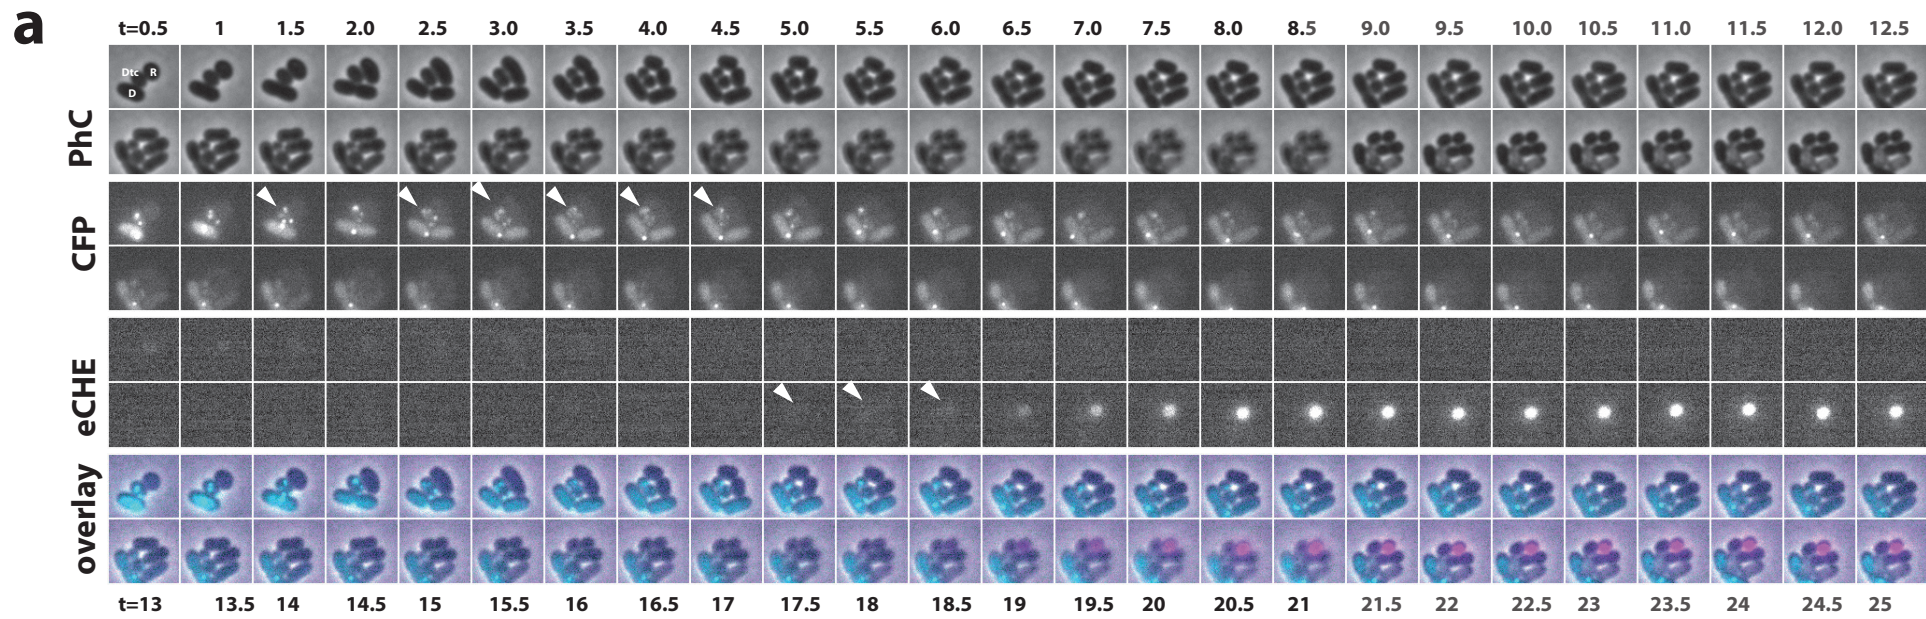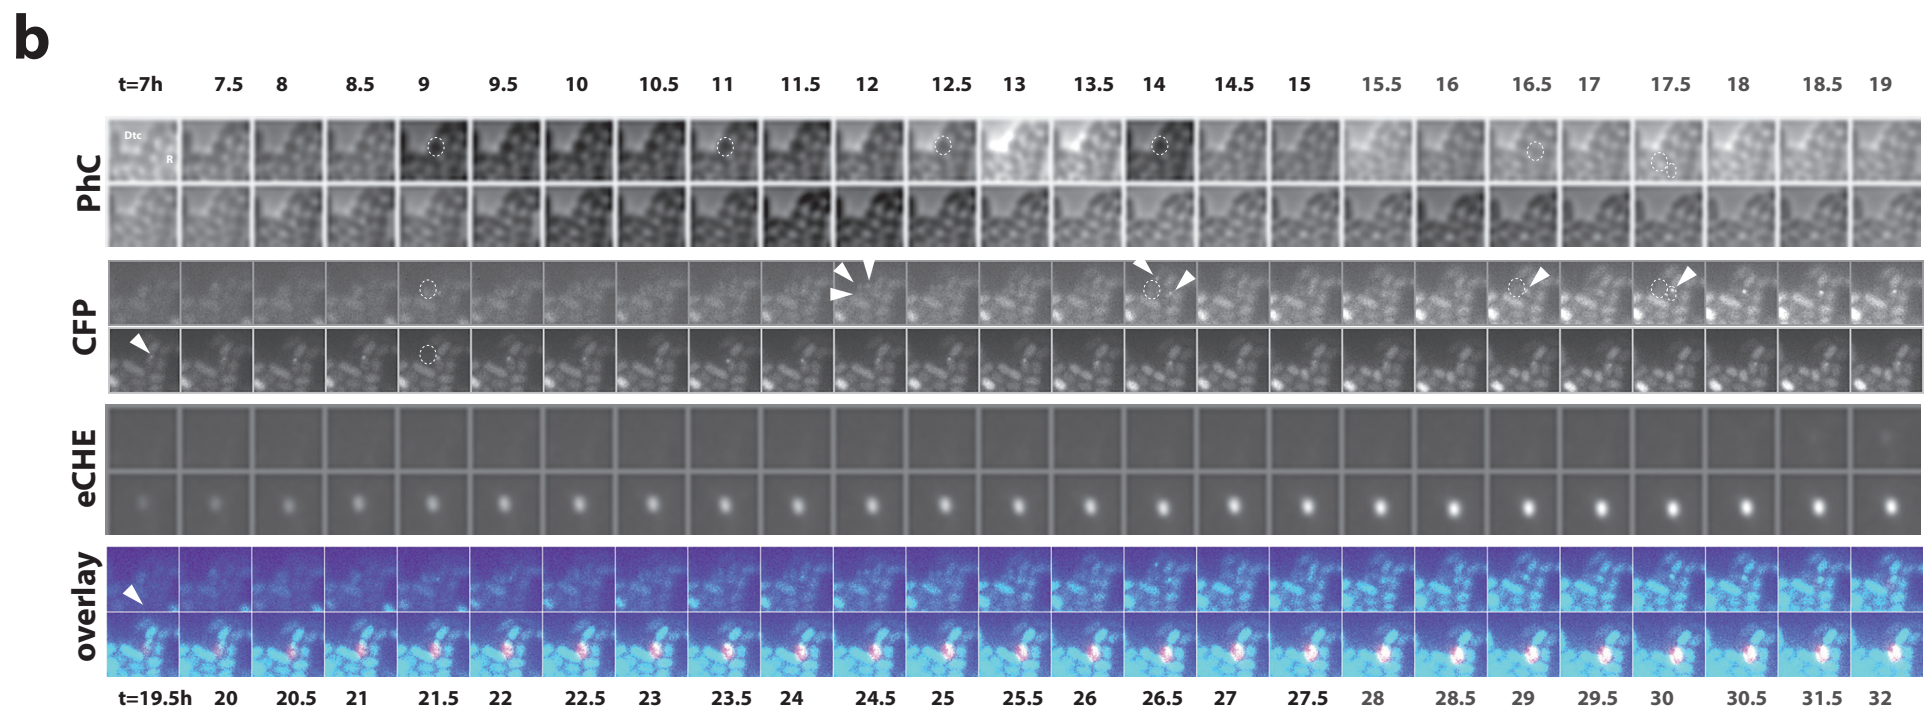

**Supplementary Figure S5** | Full relevant time steps in ICE $clc$  transfer between *P. putida* ICE $clc$   $\Delta mfsR$   $lac_{COARRAY}$   $lacI-cfp$  (strain 5224) as donor and *P. putida* UWC1  $echerry$ -'trap',  $lacI-cfp$  (strain 5248) as recipient. (Expanded data from Figure 5a and b in the main text). Time steps: 30 min. PhC, phase contrast. CFP, cyan fluorescent protein, eCHE, eCherry fluorescence. Overlay in **a**: PhC + CFP (cyan) + eCHE (magenta). Overlay in **b**: CFP (cyan) + eCHE (magenta).
