# Supplementary material for: Transient Replication in Specialized Cells Favors Transfer of an Integrative and Conjugative Element
Source: PubMed Central journal article supplement (PMC6561031; doi:10.1128/mbio.01133-19), 2019-06-11
Supplement: mBio.01133-19-st001.pdf [file mBio.01133-19-st001.pdf]

**Table S1:** Strains used in this study.

| Collection number | Strain                                                                                          | Characteristics <sup>a</sup>                                                                                                                  | Reference or source |
|-------------------|-------------------------------------------------------------------------------------------------|-----------------------------------------------------------------------------------------------------------------------------------------------|---------------------|
|                   | <i>Escherichia coli</i>                                                                         |                                                                                                                                               |                     |
| 3044              | DH5α λpir                                                                                       | <i>sup E44, ΔlacU169 (ΦlacZΔM15), recA1, endA1, hsdR17, thi-1, gyrA96, relA1, λpir</i> phage lysogen                                          | V. de Lorenzo       |
|                   | <i>Pseudomonas putida</i>                                                                       |                                                                                                                                               |                     |
| 1291              | UWC1                                                                                            | Plasmid-free derivative of <i>P. putida</i> KT2440, Rif <sup>R</sup>                                                                          | <sup>1</sup>        |
| 2737              | UWC1- <i>clc5</i>                                                                               | Derivative of strain 1291 with one ICE <i>clc</i> copy integrated into <i>tRNA<sup>Gly</sup>-5</i>                                            | <sup>2</sup>        |
| 4322              | UWC1- <i>clc5, ΔmfsR</i>                                                                        | Derivative of strain 2737 with an internal deletion in <i>mfsR</i>                                                                            | <sup>3</sup>        |
| 5001              | UWC1 <i>attB-echerry</i>                                                                        | Derivative of strain 1291 (ICE <i>clc</i> free) with the mini-Tn5 <i>attB-echerry</i> conditional fluorescent trap. Used as mating recipient. | <sup>4</sup>        |
| 5214              | UWC1- <i>clc5, lacO<sub>ARRAY</sub></i>                                                         | Derivative of strain 2737 with the <i>lacO</i> array inserted within <i>amnB</i> on ICE <i>clc</i>                                            | This study          |
| 5216              | UWC1- <i>clc5, ΔmfsR, lacO<sub>ARRAY</sub></i>                                                  | Derivative of strain 4322 with the <i>lacO</i> array inserted within <i>amnB</i> on ICE <i>clc</i>                                            | This study          |
| 5222              | UWC1- <i>clc5, lacO<sub>ARRAY</sub>, Tn7 araC; lacI-cfp</i>                                     | Derivative of strain 5214 with a mini-Tn7 <i>araC-P<sub>BAD</sub>-lacI-cfp</i> insertion                                                      | This study          |
| 5224              | UWC1- <i>clc5, ΔmfsR, lacO<sub>ARRAY</sub>, Tn7 araC; lacI-cfp</i>                              | Derivative of strain 5216 with a mini-Tn7 <i>araC-P<sub>BAD</sub>-lacI-cfp</i> insertion                                                      | This study          |
| 5228-5230         | UWC1- <i>clc5, lacO<sub>ARRAY</sub>, Tn7 araC; lacI-cfp, Tn5 P<sub>inR</sub>-echerry</i>        | Derivatives of 5222 with a mini-Tn5 <i>P<sub>inR</sub>-echerry</i> insertion                                                                  | This study          |
| 5231-5233         | UWC1- <i>clc5, ΔmfsR, lacO<sub>ARRAY</sub>, Tn7 araC; lacI-cfp, Tn5 P<sub>inR</sub>-echerry</i> | Derivatives of 5224 with a mini-Tn5 <i>P<sub>inR</sub>-echerry</i> insertion                                                                  | This study          |
| 5235              | UWC1- <i>clc5 Tn7 araC; lacI-cfp</i>                                                            | Derivative of strain 2737 with the mini-Tn7 <i>araC-P<sub>BAD</sub>-lacI-cfp</i> insertion                                                    | This study          |
| 5236              | UWC1- <i>clc5 ΔmfsR, Tn7 araC; lacI-cfp</i>                                                     | Derivative of strain 4322 with the mini-Tn7 <i>araC-P<sub>BAD</sub>-lacI-cfp</i> insertion                                                    | This study          |
| 5248              | UWC1 <i>attB-echerry, Tn7 araC; lacI-cfp</i>                                                    | Derivative of strain 5001 with mini-Tn7 <i>araC-P<sub>BAD</sub>-lacI-cfp</i> insertion. ICE <i>clc</i> free. Used as mating recipient.        | This study          |
| 5262              | UWC1- <i>clc5, ΔattL, lacO<sub>ARRAY</sub>, Tn7 araC; lacI-cfp</i>                              | Derivative of strain 5222 with a deletion of the <i>attL</i> site                                                                             | This study          |
| 5345              | UWC1- <i>clc5, ΔmfsR, ΔattL, lacO<sub>ARRAY</sub></i>                                           | Derivative of strain 5216 with a deletion of the <i>attL</i> site                                                                             | This study          |
| 5349              | UWC1- <i>clc5, Pp_1867-lacO<sub>ARRAY</sub></i>                                                 | Derivative of strain 2737 with the <i>lacO</i> array inserted close to Pp_1867 (12 kb upstream of ICE <i>clc</i> )                            | This study          |
| 5351              | UWC1- <i>clc5, ΔmfsR, ΔattL, lacO<sub>ARRAY</sub>, Tn7 araC; lacI-cfp</i>                       | Derivative of strain 5345 with the mini-Tn7 <i>araC-P<sub>BAD</sub>-lacI-cfp</i> insertion                                                    | This study          |
| 5352-5355         | UWC1- <i>clc5, ΔattL, lacO<sub>ARRAY</sub>, Tn7 araC; lacI-cfp, Tn5 P<sub>inR</sub>-echerry</i> | Derivatives of strain 5262 with a mini-Tn5 <i>P<sub>inR</sub>-echerry</i> insertion                                                           | This study          |

|                |                                                                                                                                                                                                      |                                                                                                                         |            |
|----------------|------------------------------------------------------------------------------------------------------------------------------------------------------------------------------------------------------|-------------------------------------------------------------------------------------------------------------------------|------------|
| 5357-5359      | UWC1- <i>clc5</i> , $\Delta mfsR$ , $\Delta attL$ , <i>lacO</i> <sub>ARRAY</sub> , Tn7 <i>araC</i> ; <i>lacI-cfp</i> , Tn5 P <sub>inR</sub> - <i>echerry</i>                                         | Derivatives of strain 5351 with a mini-Tn5 P <sub>inR</sub> - <i>echerry</i> insertion                                  | This study |
| 5361           | UWC1- <i>clc5</i> , Pp_1867- <i>lacO</i> <sub>ARRAY</sub> , Tn7 <i>araC</i> ; <i>lacI-cfp</i>                                                                                                        | Derivative of strain 5349 with the mini-Tn7 <i>araC</i> -P <sub>BAD</sub> - <i>lacI-cfp</i> insertion                   | This study |
| 5451           | UWC1- <i>clc5</i> , $\Delta tral$ , <i>lacO</i> <sub>ARRAY</sub>                                                                                                                                     | Derivative of strain 5214 with a deletion in the relaxase gene ( <i>orf50240</i> )                                      | This study |
| 5466           | UWC1- <i>clc5</i> , $\Delta mfsR$ , $\Delta tral$ , <i>lacO</i> <sub>ARRAY</sub>                                                                                                                     | Derivative of strain 5216 with a deletion in the relaxase gene ( <i>orf50240</i> )                                      |            |
| 5468           | UWC1- <i>clc5</i> , $\Delta tral$ , <i>lacO</i> <sub>ARRAY</sub> , Tn7 <i>araC</i> ; <i>lacI-cfp</i>                                                                                                 | Derivative of strain 5451 with the mini-Tn7 <i>araC</i> -P <sub>BAD</sub> - <i>lacI-cfp</i> insertion                   | This study |
| 5469           | UWC1- <i>clc5</i> , $\Delta mfsR$ , $\Delta tral$ , <i>lacO</i> <sub>ARRAY</sub> , Tn7 <i>araC</i> ; <i>lacI-cfp</i>                                                                                 | Derivative of strain 5466 with the mini-Tn7 <i>araC</i> -P <sub>BAD</sub> - <i>lacI-cfp</i> insertion                   | This study |
| 5484-5487      | UWC1- <i>clc5</i> , $\Delta tral$ , <i>lacO</i> <sub>ARRAY</sub> , Tn7 <i>araC</i> ; <i>lacI-cfp</i> , Tn5 P <sub>inR</sub> - <i>echerry</i>                                                         | Derivatives of strain 5468 with a mini-Tn5 P <sub>inR</sub> - <i>echerry</i> insertion                                  | This study |
| 5488-5491      | UWC1- <i>clc5</i> , $\Delta mfsR$ , $\Delta tral$ , <i>lacO</i> <sub>ARRAY</sub> , Tn7 <i>araC</i> ; <i>lacI-cfp</i> , Tn5 P <sub>inR</sub> - <i>echerry</i>                                         | Derivatives of strain 5469 with a mini-Tn5 P <sub>inR</sub> - <i>echerry</i> insertion                                  | This study |
| 5588           | UWC1- <i>clc5</i> , Pp_1867- <i>tetO</i> <sub>ARRAY</sub> , <i>lacO</i> <sub>ARRAY</sub>                                                                                                             | Derivative of strain 5214 with the insertion of a <i>tetO</i> array close to P1867 (12 kb upstream of ICE <i>clc</i> )  | This study |
| 5589           | UWC1- <i>clc5</i> , Pp_1867- <i>tetO</i> <sub>ARRAY</sub> , $\Delta mfsR$ , <i>lacO</i> <sub>ARRAY</sub>                                                                                             | Derivative of strain 5216 with the insertion of a <i>tetO</i> array close to P1867 (12 kb upstream of ICE <i>clc</i> )  | This study |
| 5591           | UWC1- <i>clc5</i> , P1867- <i>tetO</i> <sub>ARRAY</sub> , <i>lacO</i> <sub>ARRAY</sub> , Tn7 <i>araC</i> ; <i>lacI-cfp</i> / <i>tetR-yfp</i>                                                         | Derivative of strain 5588 with the mini-Tn7 <i>araC</i> -P <sub>BAD</sub> - <i>lacI-cfp</i> ; <i>tetR-yfp</i> insertion | This study |
| 5592           | UWC1- <i>clc5</i> , P1867- <i>tetO</i> <sub>ARRAY</sub> , $\Delta mfsR$ , <i>lacO</i> <sub>ARRAY</sub> , Tn7 <i>araC</i> ; <i>lacI-cfp</i> / <i>tetR-yfp</i>                                         | Derivative of strain 5589 with the mini-Tn7 <i>araC</i> -P <sub>BAD</sub> - <i>lacI-cfp</i> ; <i>tetR-yfp</i> insertion | This study |
| 5597           | UWC1- <i>clc5</i> , $\Delta oriT1$ , <i>lacO</i> <sub>ARRAY</sub>                                                                                                                                    | Derivative of strain 5214 with a deletion in <i>oriT1</i>                                                               | This study |
| 5598           | UWC1- <i>clc5</i> , $\Delta oriT2$ , <i>lacO</i> <sub>ARRAY</sub>                                                                                                                                    | Derivative of strain 5214 with a deletion in <i>oriT2</i>                                                               | This study |
| 5599           | UWC1- <i>clc5</i> , $\Delta mfsR$ , $\Delta oriT1$ , <i>lacO</i> <sub>ARRAY</sub>                                                                                                                    | Derivative of strain 5216 with a deletion in <i>oriT1</i>                                                               | This study |
| 5601-5603      | UWC1- <i>clc5</i> , P1867- <i>tetO</i> <sub>ARRAY</sub> , <i>lacO</i> <sub>ARRAY</sub> , Tn7 <i>araC</i> ; <i>lacI-cfp</i> / <i>tetR-yfp</i> , Tn5 P <sub>inR</sub> - <i>echerry</i>                 | Derivatives of strain 5591 with a mini-Tn5 P <sub>inR</sub> - <i>echerry</i> insertion                                  | This study |
| 5605 5607 5608 | UWC1- <i>clc5</i> , P1867- <i>tetO</i> <sub>ARRAY</sub> , $\Delta mfsR$ , <i>lacO</i> <sub>ARRAY</sub> , Tn7 <i>araC</i> ; <i>lacI-cfp</i> / <i>tetR-yfp</i> , Tn5 P <sub>inR</sub> - <i>echerry</i> | Derivatives of strain 5592 with a mini-Tn5 P <sub>inR</sub> - <i>echerry</i> insertion                                  | This study |
| 5647           | UWC1- <i>clc5</i> , $\Delta oriT1$ , <i>lacO</i> <sub>ARRAY</sub> , Tn7 <i>araC</i> ; <i>lacI-cfp</i>                                                                                                | Derivative of strain 5597 with the mini-Tn7 <i>araC</i> -P <sub>BAD</sub> - <i>lacI-cfp</i> insertion                   | This study |
| 5648           | UWC1- <i>clc5</i> , $\Delta oriT2$ , <i>lacO</i> <sub>ARRAY</sub> , Tn7 <i>araC</i> ; <i>lacI-cfp</i>                                                                                                | Derivative of strain 5598 with the mini-Tn7 <i>araC</i> -P <sub>BAD</sub> - <i>lacI-cfp</i> insertion                   | This study |
| 5712           | UWC1- <i>clc5</i> $\Delta oriT1$ , <i>lacO</i> <sub>ARRAY</sub> , Tn7 <i>araC</i> ; <i>lacI-cfp</i> , Tn5 P <sub>inR</sub> - <i>echerry</i> , Tn5 compl- <i>oriT1</i>                                | Derivative of strain 5688 complementing deletion of <i>oriT1</i> in trans                                               | This study |
| 5713           | UWC1- <i>clc5</i> $\Delta oriT2$ , <i>lacO</i> <sub>ARRAY</sub> , Tn7 <i>araC</i> ; <i>lacI-cfp</i> , Tn5 P <sub>inR</sub> - <i>echerry</i> , Tn5 compl- <i>oriT2</i>                                | Derivative of strain 5673 complementing deletion of <i>oriT2</i> in trans                                               | This study |

1. McClure, N. C., Weightman, A. J. & Fry, J. C. Survival of *Pseudomonas putida* UWC1 containing cloned catabolic genes in a model activated-sludge unit. *Appl Environ Microbiol* **55**, 2627-2634 (1989).
2. Sentchilo, V. *et al.* Intracellular excision and reintegration dynamics of the ICE<sub>clc</sub> genomic island of *Pseudomonas knackmussii* sp. strain B13. *Mol Microbiol* **72**, 1293-1306 (2009).
3. Pradervand, N. *et al.* An operon of three transcriptional regulators controls horizontal gene transfer of the Integrative and Conjugative Element ICE<sub>clc</sub> in *Pseudomonas knackmussii* B13. *PLoS Genet* **10**, e1004441 (2014).
4. Delavat, F., Mitri, S., Pelet, S. & van der Meer, J. R. Highly variable individual donor cell fates characterize robust horizontal gene transfer of an integrative and conjugative element. *Proc Natl Acad Sci U S A* **113**, E3375-3383 (2016).
